# Supplementary material for: Genomic and Phenotypic Comparisons Reveal Distinct Variants of Wolbachia Strain wAlbB
Source: PubMed Central journal article supplement (PMC9680635; doi:10.1128/aem.01412-22), 2022-11-01
Supplement: aem.01412-22-s0001.pdf [file aem.01412-22-s0001.pdf]

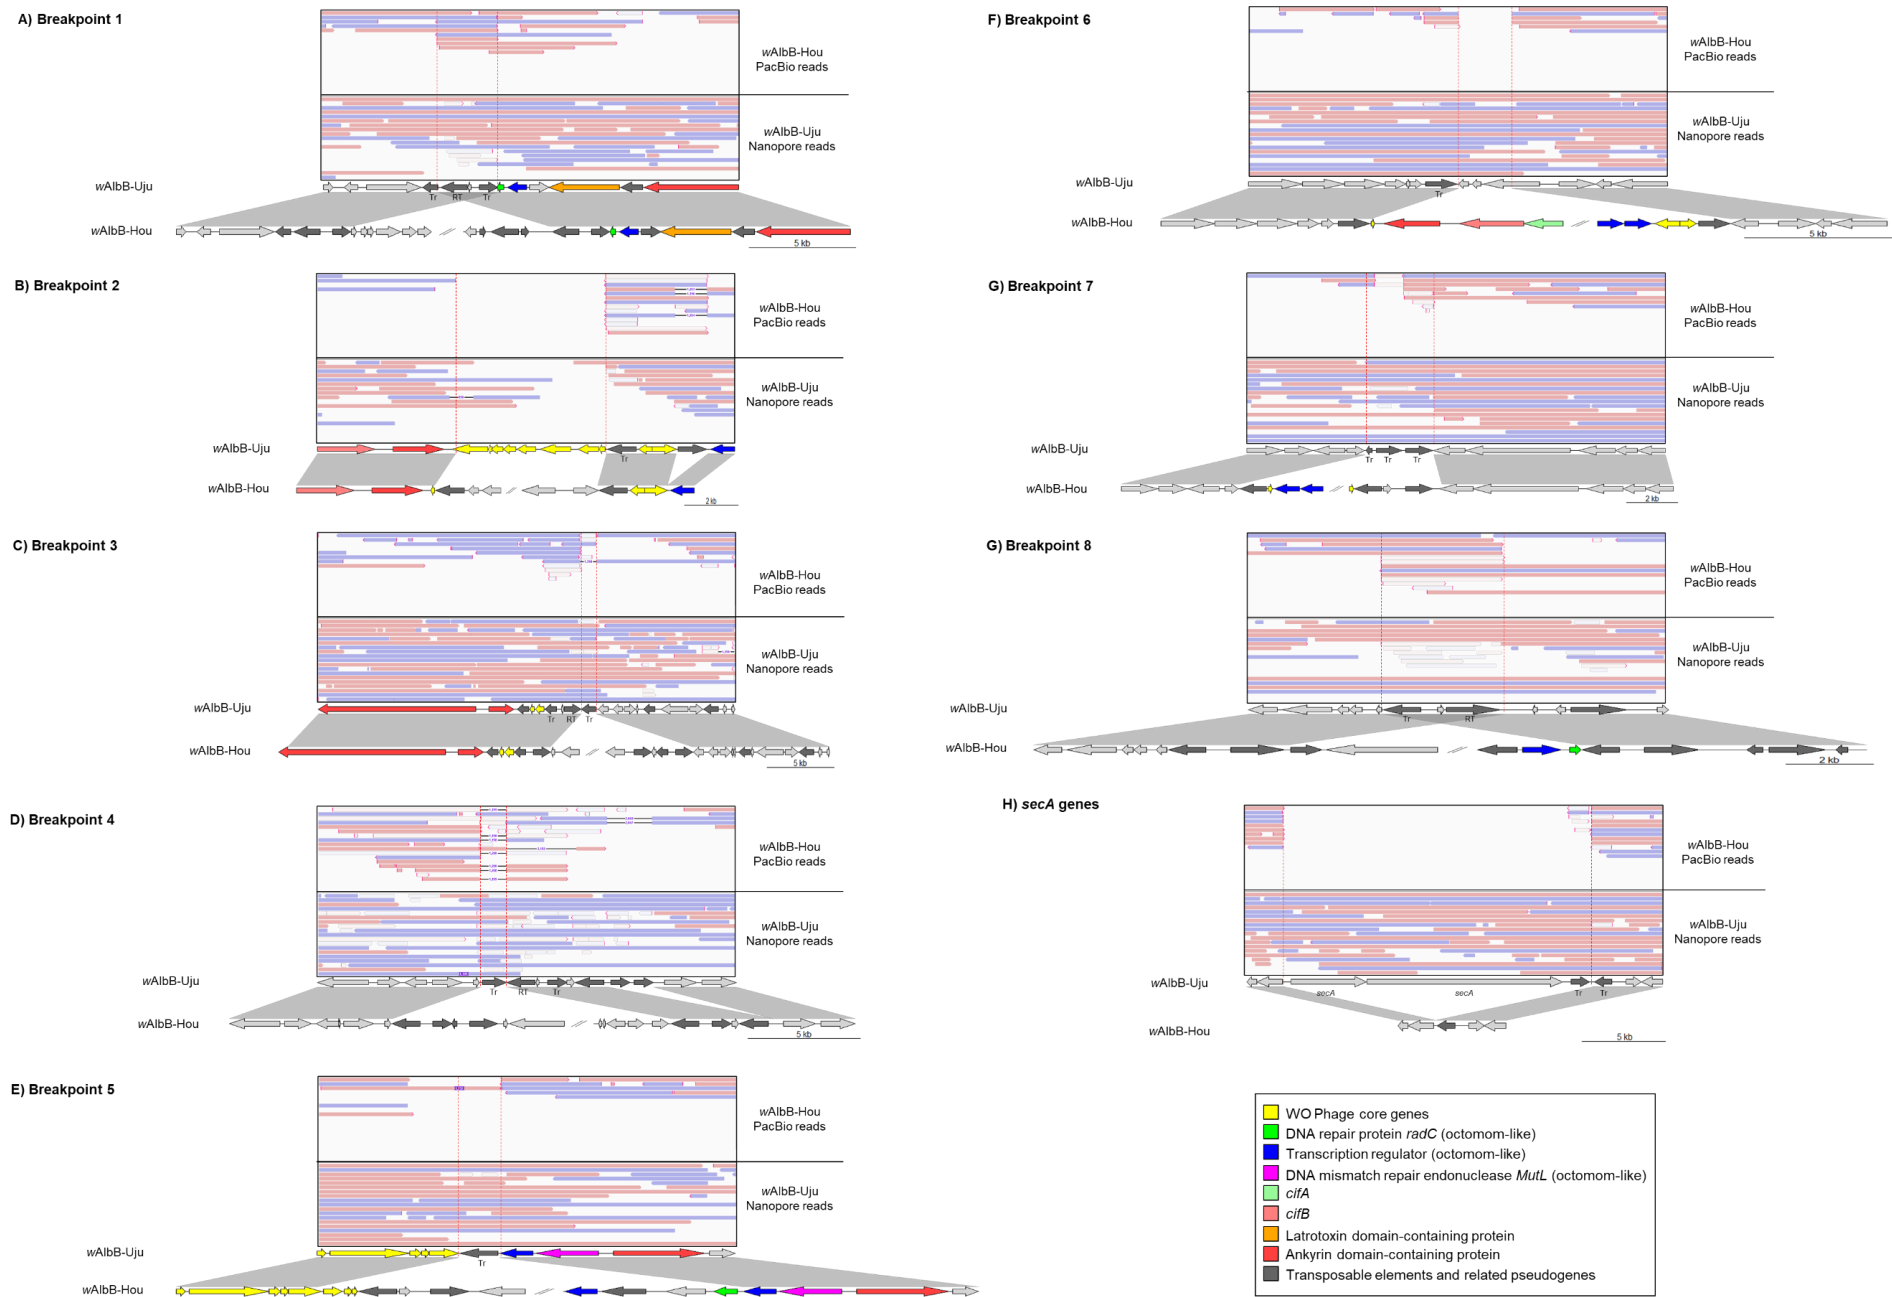

**Figure S1. Analysis of chromosomal breakpoints between *wAlbB-Uju* and *wAlbB-Hou*.** Alignment boxes display long reads from both variants (SRA accessions: SRR21023725 and SRR7784287) aligned to the *wAlbB-Uju* genome at chromosomal breakpoints (A-G) and a large indel comprising horizontally-transferred *SecA* genes (H). Dashed red lines indicate chromosomal breakpoints. Tr: transposase ; RT: reverse transcriptase.

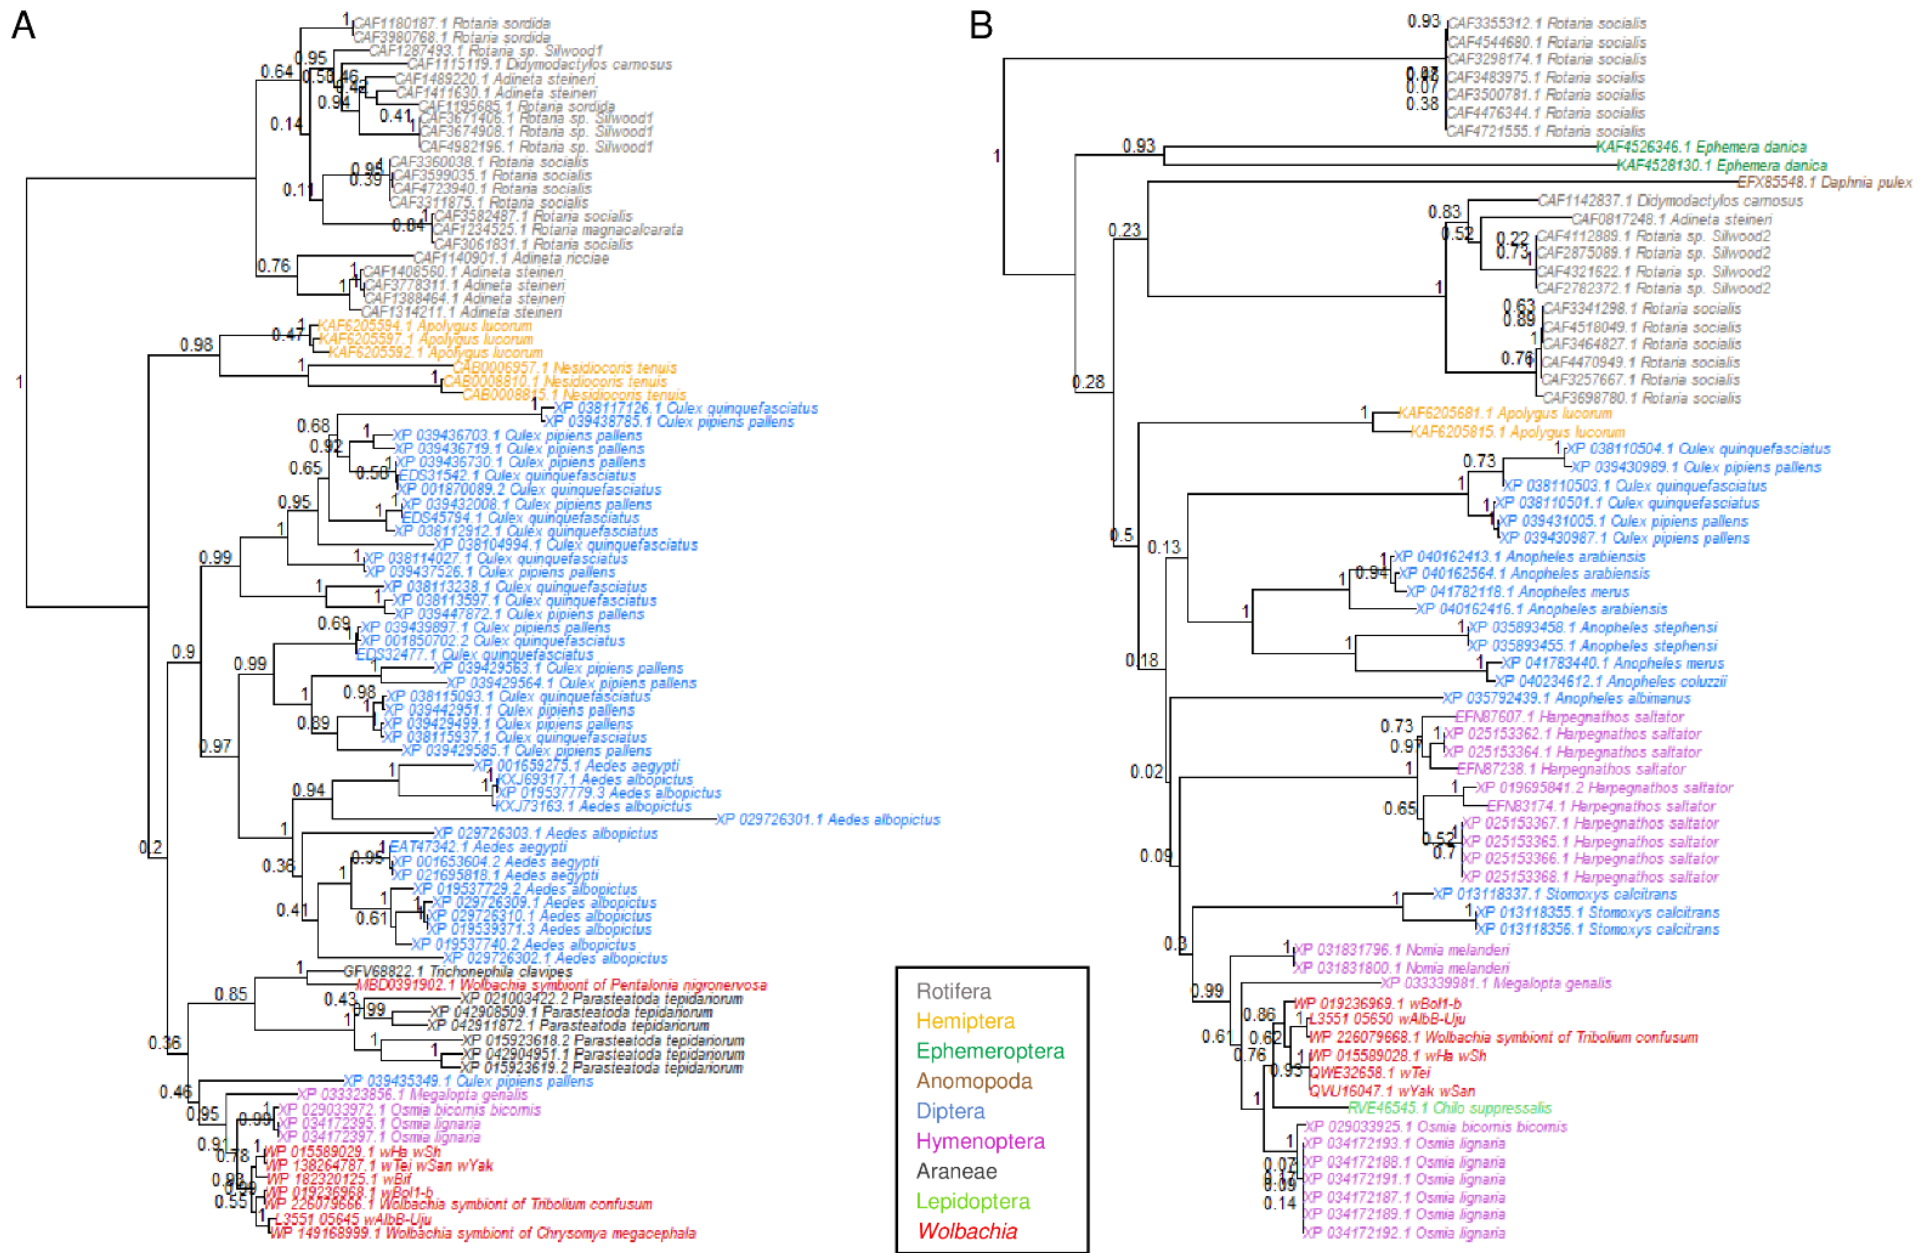

**Figure S2. Maximum likelihood phylogenies of horizontally-transferred translocase subunit SecA genes.** (A) L3551\_05645 and (B) L3551\_05650 amino acids were aligned with their homologues and conserved sites (Gblocks) were used to build the phylogenies with PhyML. Node labels are bootstrap supports calculated from 100 replicates.

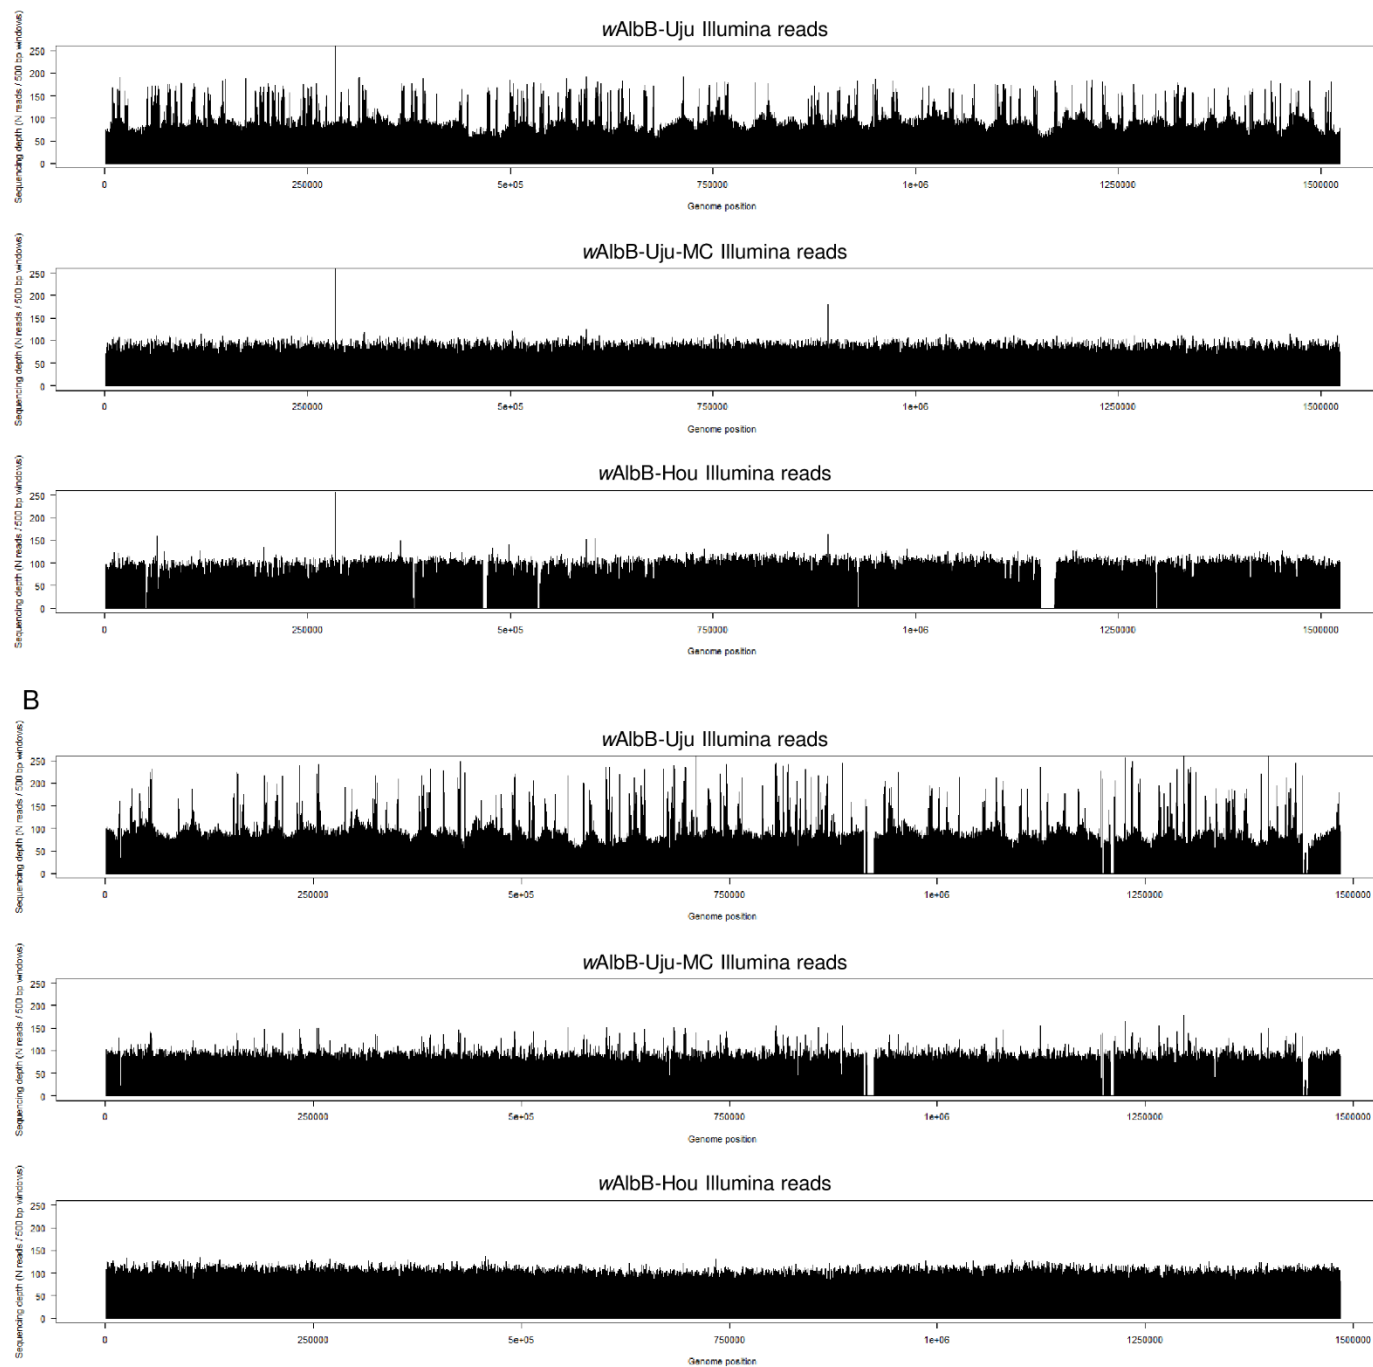

**Figure S3. Sequencing depth plots.** Mean sequencing depth per 500 bp window of Illumina reads mapped onto (A) *wAlbB-Uju* and (B) *wAlbB-Hou* genomes.

| Trait                           | Factor                              | Type III Sum of Squares | df  | Mean Square | F      | P                  |
|---------------------------------|-------------------------------------|-------------------------|-----|-------------|--------|--------------------|
| Female <i>Wolbachia</i> density | wAlbB variant                       | 2.863                   | 1   | 2.863       | 11.068 | <b>0.001</b>       |
|                                 | Nuclear background                  | 0.637                   | 1   | 0.637       | 2.464  | 0.119              |
|                                 | Error                               | 39.57                   | 153 | 0.259       |        |                    |
| Male <i>Wolbachia</i> density   | wAlbB variant                       | 4.764                   | 1   | 4.764       | 24.111 | <b>&lt; 0.0001</b> |
|                                 | Nuclear background                  | 0.216                   | 1   | 0.216       | 1.093  | 0.298              |
|                                 | wAlbB variant by nuclear background | 1.688                   | 1   | 1.688       | 8.541  | <b>0.004</b>       |
|                                 | Error                               | 29.442                  | 149 | 0.198       |        |                    |

**Table S3. Statistical analysis of differences in density between wAlbB variants.**

| Sex    | Factor                              | Type III Sum of Squares | df  | Mean Square | F      | P                  |
|--------|-------------------------------------|-------------------------|-----|-------------|--------|--------------------|
| Female | wAlbB variant                       | 64.79                   | 1   | 64.79       | 71.089 | <b>&lt; 0.0001</b> |
|        | Nuclear background                  | 4.738                   | 1   | 4.738       | 5.199  | <b>0.024</b>       |
|        | Temperature                         | 41.206                  | 1   | 41.206      | 45.211 | <b>&lt; 0.0001</b> |
|        | wAlbB variant by Nuclear background | 13.486                  | 1   | 13.486      | 14.797 | <b>&lt; 0.0001</b> |
|        | wAlbB variant by Temperature        | 28.611                  | 1   | 28.611      | 31.393 | <b>&lt; 0.0001</b> |
|        | Error                               | 103.899                 | 114 | 0.911       |        |                    |
| Male   | wAlbB variant                       | 55.897                  | 1   | 55.897      | 95.736 | <b>&lt; 0.0001</b> |
|        | Nuclear background                  | 1.162                   | 1   | 1.162       | 1.991  | 0.161              |
|        | Temperature                         | 30.633                  | 1   | 30.633      | 52.467 | <b>&lt; 0.0001</b> |
|        | wAlbB variant by Nuclear background | 3.478                   | 1   | 3.478       | 5.957  | <b>0.016</b>       |
|        | wAlbB variant by Temperature        | 28.237                  | 1   | 28.237      | 48.362 | <b>&lt; 0.0001</b> |
|        | Error                               | 66.56                   | 114 | 0.584       |        |                    |

**Table S4. Statistical analysis of wAlbB variant densities under heat stress.**

| Population comparison                        | Factor                            |            | Type III<br>Sum of<br>Squares | df   | Mean<br>Square | F      | P               |
|----------------------------------------------|-----------------------------------|------------|-------------------------------|------|----------------|--------|-----------------|
| wAlbB-infected populations                   | Egg storage duration <sup>2</sup> | Hypothesis | 14.518                        | 1    | 14.518         | 78.446 | < <b>0.0001</b> |
|                                              |                                   | Error      | 41.27                         | 223  | 0.185          |        |                 |
|                                              | Egg storage duration              | Hypothesis | 2.067                         | 1    | 2.067          | 11.17  | <b>0.001</b>    |
|                                              |                                   | Error      | 41.27                         | 223  | 0.185          |        |                 |
| wAlbB variant                                |                                   | Hypothesis | 7.815                         | 1    | 7.815          | 12.236 | 0.072           |
|                                              |                                   | Error      | 1.284                         | 2.01 | 0.639          |        |                 |
| Nuclear background                           |                                   | Hypothesis | 1.754                         | 1    | 1.754          | 9.475  | <b>0.002</b>    |
|                                              |                                   | Error      | 41.27                         | 223  | 0.185          |        |                 |
| Replicate population<br>within wAlbB variant |                                   | Hypothesis | 1.285                         | 2    | 0.643          | 3.472  | <b>0.033</b>    |
|                                              |                                   | Error      | 41.27                         | 223  | 0.185          |        |                 |
| wAlbB variant by<br>Nuclear background       |                                   | Hypothesis | 0.694                         | 1    | 0.694          | 3.75   | 0.054           |
|                                              |                                   | Error      | 41.27                         | 223  | 0.185          |        |                 |

**Table S5. Statistical of quiescent egg viability.**
